# Supplementary material
Source: PubMed Central journal article supplement (PMC2810413)
Supplement: Supp_Video.pdf [file Supp_Video.pdf]

**SUPPLEMENTAL VIDEO S1.** Confocal image of hMSCs seeded within macroporous hydrogels and cultured in basal medium, 7 weeks after seeding. Viable cells were stained with calcein AM.
